# Supplementary material for: Burden of Urological Complications in Men and Women With Long-standing Type 1 Diabetes in the Diabetes Control and Complications Trial/Epidemiology of Diabetes Interventions and Complications Cohort
Source: Oxford University Press journal article supplement (doi:10.2337/dc18-0255), 2018-08-13
Supplement: dc180255supplementarydata.pdf [file dc180255supplementarydata.pdf]

## SUPPLEMENTARY DATA

### **DCCT/EDIC Study Group**

The members of the DCCT/EDIC Study Group at the time of this publication follow:

*Study Chairpersons* – D.M. Nathan, B. Zinman (vice-chair), O. Crofford (past), S. Genuth (past)

#### **Clinical Centers**

*Albert Einstein College of Medicine* – J. Brown-Friday (past), J. Crandall (past), H. Engel (past), S. Engel (past), H. Martinez (past), M. Phillips (past), M. Reid (past), H. Shamoon (past), J. Sheindlin (past)

*Case Western Reserve University* – R. Gubitosi-Klug, L. Mayer, S. Pendegast, H. Zegarra, D. Miller, L. Singerman, S. Smith-Brewer, M. Novak, J. Quin (past), Saul Genuth (past), M. Palmert (past), E. Brown (past), J. McConnell (past), P. Pugsley (past), P. Crawford (past), W. Dahms (deceased)

*Weill Cornell Medical College* – N.S. Gregory, M.E. Lackaye, S. Kiss, R. Chan, A. Orlin, M. Rubin, D. Brillon (past), V. Reppucci (past), T. Lee (past), M. Heinemann (past), S. Chang (past), B. Levy (past), L. Jovanovic (past), M. Richardson (past), B. Bosco (past), A. Dwoskin (past), R. Hanna (past), S. Barron (past), R. Campbell (deceased)

*Henry Ford Health System* – A. Bhan, D. Kruger, J.K. Jones, P.A. Edwards, A. Bhan, J.D. Carey, E. Angus, A. Thomas, A. Galprin (past), M. McLellan (past), F. Whitehouse (past)

*International Diabetes Center* – R. Bergenstal, M. Johnson, K. Gunyou, L. Thomas, J. Laechelt, P. Hollander (past), M. Spencer (past), D. Kendall (past), R. Cuddihy (past), P. Callahan (past), S. List (past), J. Gott (past), N. Rude (past), B. Olson (past), M. Franz (past), G. Castle (past), R. Birk (past), J. Nelson (past), D. Freking (past), L. Gill (past), W. Mestrezat (past), D. Etwiler (deceased), K. Morgan (deceased)

*Joslin Diabetes Center* – L.P. Aiello, E. Golden, P. Arrigg, V. Asuquo, R. Beaser, L. Bestourous, J. Cavallerano, R. Cavicchi, O. Ganda, O. Hamdy, R. Kirby, T. Murtha, D. Schlossman, S. Shah, G. Sharuk, P. Silva, P. Silver, M. Stockman, J. Sun, E. Weimann, H. Wolpert, L.M. Aiello (past), A. Jacobson (past), L. Rand (past), J. Rosenzweig (past)

*Massachusetts General Hospital* – D.M. Nathan, M.E. Larkin, M. Christofi, K. Folino, J. Godine, P. Lou, C. Stevens, E. Anderson (past), H. Bode (past), S. Brink (past), C. Cornish (past), D. Cros (past), L. Delahanty (past), A. deManbey (past), C. Haggan (past), J. Lynch (past), C. McKitrick (past), D. Norman (past), D. Moore (past), M. Ong (past), C. Taylor (past), D. Zimbler (past), S. Crowell (past), S. Fritz (past), K. Hansen (past), C. Gauthier-Kelly (past)

*Mayo Clinic* – F.J. Service, G. Ziegler, A. Barkmeier, L. Schmidt (past), B. French (past), R. Woodwick (past), R. Rizza (past), W.F. Schwenk (past), M. Haymond (past), J. Pach (past), J. Mortenson (past), B. Zimmerman (deceased), A. Lucas (deceased), R. Colligan (deceased)

*Medical University of South Carolina* – L. Luttrell, M. Lopes-Virella, S. Caulder, C. Pittman, N. Patel, K. Lee, M. Nutaitis, J. Fernandes, K. Hermayer, S. Kwon, A. Blevins, J. Parker, J. Colwell (past), D.

## SUPPLEMENTARY DATA

Lee (past), J. Soule (past), P. Lindsey (past), M. Bracey (past), A. Farr (past), S. Elsing (past), T. Thompson (past), J. Selby (past), T. Lyons (past), S. Yacoub-Wasef (past), M. Szpiech (past), D. Wood (past), R. Mayfield (past)

*Northwestern University* – M. Molitch, D. Adelman, S. Colson, L. Jampol, A. Lyon, M. Gill, Z. Strugula, L. Kaminski, R. Mirza, E. Simjanoski, D. Ryan, C. Johnson, A. Wallia, S. Ajroud-Driss, P. Astelford, N. Leloudes, A. Degillio, B. Schaefer (past)

*University of California, San Diego* – S. Mudaliar, G. Lorenzi, M. Goldbaum, K. Jones (past), M. Prince (past), M. Swenson (past), I. Grant (past), R. Reed (past), R. Lyon (past), O. Kolterman (past), M. Giotto (past), T. Clark (past), G. FriedenberG (deceased)

*University of Iowa* – W.I. Sivitz, B. Vittetoe, J. Kramer, M. Bayless (past), R. Zeitler (past), H. Schrott (past), N. Olson (past), L. Snetselaar (past), R. Hoffman (past), J. MacIndoe (past), T. Weingeist (past), C. Fountain (past)

*University of Maryland School of Medicine* – R. Miller, S. Johnsonbaugh, M. Patronas, M. Carney, S. Mendley (past), P. Salemi (past), R. Liss (past), M. Hebdon (past), D. Counts (past), T. Donner (past), J. Gordon (past), R. Hemady (past), A. Kowarski (past), D. Ostrowski (past), S. Steidl (past), B. Jones (past)

*University of Michigan* – W.H. Herman, C.L. Martin, R. Pop-Busui, D.A. Greene (past), M.J. Stevens (past), N. Burkhart (past), T. Sandford (past), J. Floyd (deceased)

*University of Minnesota* – J. Bantle, N. Flaherty, J. Terry, D. Koozekanani, S. Montezuma, N. Wimmergren (past), B. Rogness (past), M. Mech (past), T. Strand (past), J. Olson (past), L. McKenzie (past), C. Kwong (past), F. Goetz (past), R. Warhol (past)

*University of Missouri* – D. Hainsworth, D. Goldstein, S. Hitt, J. Giangiacomo (deceased)

*University of New Mexico* – D.S. Schade, J.L. Canady, M.R. Burge, A. Das, R.B. Avery, L.H. Ketai, J.E. Chapin, M.L. Schluter (past), J. Rich (past), C. Johannes (past), D. Hornbeck (past)

*University of Pennsylvania* – M. Schutta, P.A. Bourne, A. Brucker, S. Braunstein (past), S. Schwartz (past), B.J. Maschak-Carey (past), L. Baker (deceased)

*University of Pittsburgh* – T. Orchard, L. Cimino, T. Songer, B. Doft, S. Olson, D. Becker, D. Rubinstein, R.L. Bergren, J. Fruit, R. Hyre, C. Palmer, N. Silvers (past), L. Lobes (past), P. Paczan Rath (past), P.W. Conrad (past), S. Yalamanchi (past), J. Wesche (past), M. Bratkowski (past), S. Arslanian (past), J. Rinkoff (past), J. Warnicki (past), D. Curtin (past), D. Steinberg (past), G. Vagstad (past), R. Harris (past), L. Steranchak (past), J. Arch (past), K. Kelly (past), P. Ostrosaka (past), M. Guiliani (past), M. Good (past), T. Williams (past), K. Olsen (past), A. Campbell (past), C. Shipe (past), R. Conwit (past), D. Finegold (past), and M. Zaucha (past), A. Drash (deceased)

*University of South Florida* – A. Morrison, J.I. Malone, M.L. Bernal, P.R. Pavan, N. Grove, E.A. Tanaka (past), D. McMillan (past), J. Vaccaro-Kish (past), L. Babbione (past), H. Solc (past), T.J. DeClue (past)

## SUPPLEMENTARY DATA

*University of Tennessee* – S. Dagogo-Jack, C. Wigley, H. Ricks, A. Kitabchi, E. Chaum, M.B. Murphy (past), S. Moser (past), D. Meyer (past), A. Iannacone (past), S. Yoser (past), M. Bryer-Ash (past), S. Schussler (past), H. Lambeth (past)

*University of Texas Southwestern Medical Center at Dallas* – P. Raskin, S. Strowig, M. Basco (past), S. Cercone (deceased)

*University of Toronto* – B. Zinman, A. Barnie, R. Devenyi, M. Mandelcorn, M. Brent, S. Rogers, A. Gordon, N. Bakshi, B. Perkins, L. Tuason, F. Perdikaris, R. Ehrlich (past), D. Daneman (past), K. Perlman (past), S. Ferguson (past)

*University of Washington* – J. Palmer, R. Fahlstrom, I.H.de Boer, J. Kinyoun, L. Van Ottingham, S. Catton (past), J. Ginsberg (past)

*University of Western Ontario* – C. McDonald, J. Harth, M. Driscoll, T. Sheidow, J. Mahon (past), C. Canny (past), D. Nicolle (past), P. Colby (past), J. Dupre (past), I. Hramiak (past), N.W. Rodger (past), M. Jenner (past), T. Smith (past), W. Brown (past)

*Vanderbilt University* – M. May, J. Lipps Hagan, A. Agarwal, T. Adkins, R. Lorenz (past), S. Feman (past), L. Servant (deceased)

*Washington University, St. Louis* – N.H. White, L. Levandoski, G. Grand, M. Thomas, D. Joseph, K. Blinder, G. Shah, D. Burgess (past), I. Boniuk (deceased), J. Santiago (deceased)

*Yale University School of Medicine* – W. Tamborlane, P. Gatcomb, K. Stoessel, P. Ramos, K. Fong, P. Ossorio, J. Ahern (past)

### **Clinical Coordinating Center**

*Case Western Reserve University* – R. Gubitosi-Klug, L. Meadema-Mayer, C. Beck, K. Farrell, S. Genuth (past), J. Quin (past), P. Gaston (past), M. Palmert (past), R. Trail (past), W. Dahms (deceased)

### **Data Coordinating Center**

*George Washington University, The Biostatistics Center* – J. Lachin, J. Backlund, I. Bebu, B. Braffett, L. Diminick, X. Gao, W. Hsu, K. Klumpp, H. Pan, V. Trapani, P. Cleary (past), P. McGee (past), W. Sun (past), S. Villavicencio (past), K. Anderson (past), L. Dews (past), Naji Younes (past), B. Rutledge (past), K. Chan (past), D. Rosenberg (past), B. Petty (past), A. Determan (past), D. Kenny (past), C. Williams (deceased)

### **National Institute of Diabetes and Digestive and Kidney Diseases**

*National Institute of Diabetes and Digestive and Kidney Diseases Program Office* – C. Cowie, C. Siebert (past)

## SUPPLEMENTARY DATA

### Central Units

*Central Biochemistry Laboratory (University of Minnesota)* – M. Steffes, V. Arends, J. Bucksa (past), M. Nowicki (past), B. Chavers (past)

*Central Carotid Ultrasound Unit (New England Medical Center)* – D. O’Leary, J. Polak, A. Harrington, L. Funk (past)

*Central ECG Reading Unit (University of Minnesota)* – R. Crow (past), B. Gloeb (past), S. Thomas (past), C. O’Donnell (past)

*Central ECG Reading Unit (Wake Forest School of Medicine)* – E.Z. Soliman, Z.M. Zhang, Y. Li, C. Campbell, L. Keasler, S. Hensley, J. Hu, M. Barr, T. Taylor, R. Prineas (past)

*Central Neurologic Reading Center (University of Michigan, Mayo Clinic, Southern Illinois University)* – E.L. Feldman (past), J.W. Albers (past), P. Low (past), C. Sommer (past), K. Nickander (past), T. Spiegelberg (past), M. Pfeifer (past), M. Schumer (past), M. Moran (past), J. Farquhar (past)

*Central Neuropsychological Coding Unit (University of Pittsburgh)* – C. Ryan (past), D. Sandstrom (past), T. Williams (past), M. Geckle (past), E. Cupelli (past), F. Thoma (past), B. Burzuk (past), T. Woodfill (past)

*Central Ophthalmologic Reading Center (University of Wisconsin)* – R. Danis, B. Blodi, D. Lawrence, H. Wabers, S. Gangaputra (past), S. Neill (past), M. Burger (past), J. Dingleline (past), V. Gama (past), R. Sussman (past), M. Davis (past), L. Hubbard (past)

*Computed Tomography Reading Center (Harbor UCLA Research and Education Institute)* – M. Budoff, S. Darabian, P. Rezaeian, N. Wong (past), M. Fox (past), R. Oudiz (past), L. Kim (past), R. Detrano (past)

*Audiometry Reading Center (EpiSense, University of Wisconsin)* – K. Cruickshanks, D. Dalton, K. Bainbridge (*National Institute on Deafness and Other Communication Disorders*)

*Cardiac MR Reading Center (Johns Hopkins University, National Heart Lung and Blood Institute)* – J. Lima, D. Bluemke, E. Turkbey, R. J. van der Geest (past), C. Liu (past), A. Malayeri (past), A. Jain (past), C. Miao (past), H. Chahal (past), R. Jarboe (past)

*Editor, EDIC Publications* – D.M. Nathan

## SUPPLEMENTARY DATA

### **Collaborators**

*Advanced Glycation End Products (Case Western Reserve University)* – V. Monnier, D. Sell, C. Strauch

*Biomarkers (Cleveland Clinic)* – S. Hazen, A. Pratt, W. Tang

*Central Obesity Study (University of Washington)* – J. Brunzell, J. Purnell

*Epigenetics (Beckman Research Institute of City of Hope Medical Center)* – R. Natarajan, F. Miao, L. Zhang, Z. Chen

*Genetic Studies (Hospital for Sick Children)* – A. Paterson, A. Boright, S. Bull, L. Sun, S. Scherer (past)

*Molecular Risk Factors Program Project (Medical University of South Carolina)* – M. Lopes-Virella, T.J. Lyons, A. Jenkins, R. Klein, G. Virella, A. Jaffa, R. Carter, J. Stoner, W.T. Garvey (past), D. Lackland (past), M. Brabham (past), D. McGee (past), D. Zheng (past), R. K. Mayfield (past)

*SCOUT (Verelight)* – J. Maynard (past)

*UroEDIC (University of Washington, University of Michigan)* – H. Wessells, A. Sarma, A. Jacobson, R. Dunn, S. Holt, J. Hotaling, C. Kim, Q. Clemens, J. Brown (past), K. McVary (past)
